## CORRECTION

# Correction: Exposure to hot temperatures during lactation in Swiss mice stunts offspring growth and decreases future reproductive performance of female offspring

**Meng-Huan Bao, Li-Bing Chen, Catherine Hambly, John R. Speakman and Zhi-Jun Zhao**

There was an error published in the online full-text and PDF versions of *Journal of Experimental Biology* (2020) **223**, jeb223560 (doi:10.1242/jeb.223560).

The common name of the study organism was originally given as striped hamsters in the title of the article. The correct name appears in the title above, and both the online full-text and PDF versions of the article have been updated to reflect that the research was carried out with Swiss mice, as stated elsewhere in the article.

The authors apologise to readers for this error.
